# Supplementary material for: A platform for whole-genome speed introgression from Aegilops tauschii to wheat for breeding future crops
Source: Springer Nature journal article supplement (doi:10.1038/s41596-023-00922-8), 2023-11-28
Supplement: MOESM1 [file 41596_2023_922_MOESM1_ESM11.pdf]

# A platform for whole-genome speed introgression from *Aegilops tauschii* to wheat for breeding future crops

In the format provided by the  
authors and unedited

**A platform for whole genome speed introgression from *Aegilops*  
*tauschii* to wheat for breeding future crops**

Hao Li<sup>1,2,4</sup>, Lele Zhu<sup>1,4</sup>, Ruixiao Fan<sup>1,4</sup>, Zheng Li<sup>1</sup>, Yifan Liu<sup>1</sup>, Aaqib Shaheen<sup>1</sup>, Fang Nie<sup>1</sup>, Can Li<sup>1</sup>,  
Xuqin Liu<sup>1</sup>, Yuanyuan Li<sup>1</sup>, Wenjuan Liu<sup>1</sup>, Yingying Yang<sup>1</sup>, Tutu Guo<sup>1</sup>, Yu Zhu<sup>1</sup>, Mengchen Bu<sup>1</sup>,  
Chenglin Li, Huihui Liang<sup>1</sup>, Shenglong Bai<sup>1</sup>, Feifei Ma<sup>1</sup>, Guanghui Guo<sup>2</sup>, Zhen Zhang<sup>2</sup>, Jinling  
Huang<sup>1,3</sup>, Yun Zhou<sup>1\*</sup>, Chun-Peng Song<sup>1\*</sup>

<sup>1</sup> State Key Laboratory of Crop Stress Adaptation and Improvement, School of Life Sciences,  
Henan University, Kaifeng, China

<sup>2</sup> State Key Laboratory of Crop Stress Adaptation and Improvement, College of Agriculture,  
Henan University, Kaifeng, China

<sup>3</sup> Department of Biology, East Carolina University, Greenville, NC, USA

<sup>4</sup> These authors contributed equally to this work.

\*Emails: C.-P.S. (songcp@henu.edu.cn) or Y.Z. (zhoumouyun@vip.henu.edu.cn)

**Supplementary Figures 1-2**

**Supplementary Table 1-3**

**Supplementary Table 1 and Table 3 in separate Excel file**

**Supplementary Video file**

## Supplementary Figures

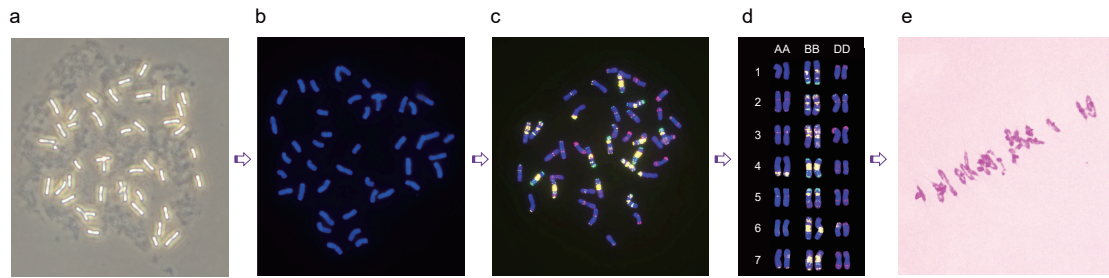

**Supplementary Fig. 1. Mitotic chromosome analysis during the development of AWIs.**

a, a good mitotic cell showing clear chromosome shape under the phase contrast channel. b, a captured image of a cell showing chromosome shape with a 100× oil lens under the DAPI channel using a fluorescence microscope. c, a merged image of four channels (DAPI, FITC, TXRED and CY5) into a single picture after capturing. d, label and process the karyotype analysis on each image according to the standard karyotype of wheat. Blue: DAPI, green: oligo-pSc119.2-1, red: oligo-pTa535-1, yellow: oligo-(GAA)<sub>10</sub> and pTa71-2. e, a good meiotic cell showing clear chromosome pairing.

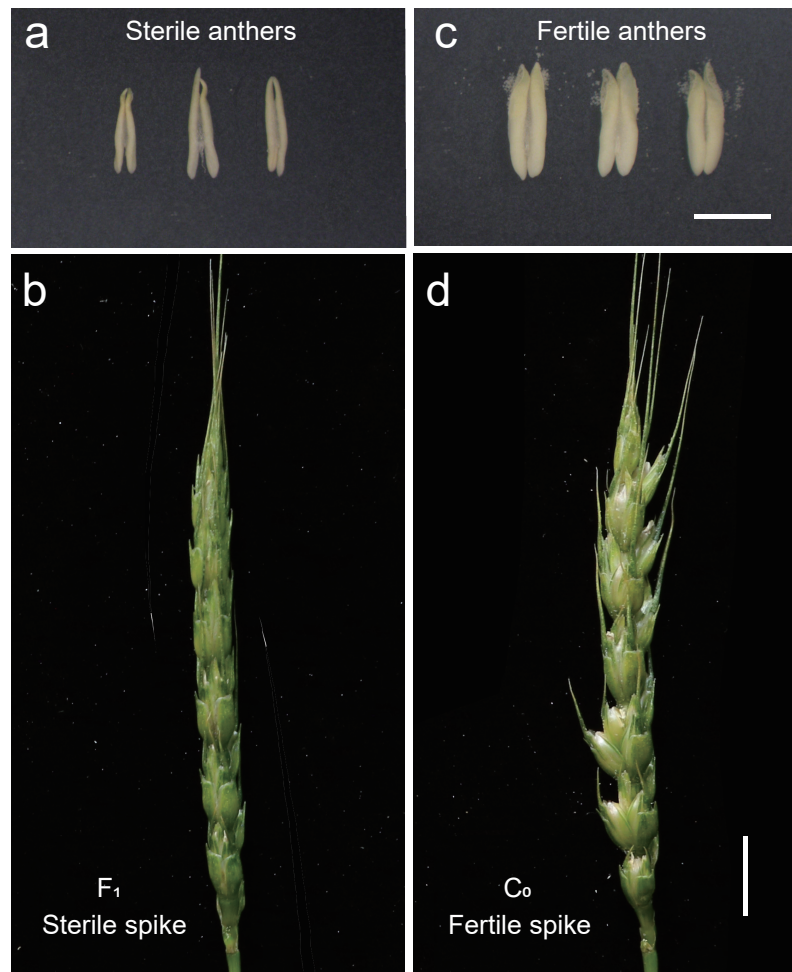

**Supplementary Fig. 2. Spikes and anthers of a  $F_1/C_0$  chimeric hybrid after colchicine treatment.**

a and b, a sterile spike showing sterile anthers and no seedset. c and d, a fertile spike showing fertile anthers and seedset. Bar = 2 mm (a, c); Bar = 1 cm (b, d).



**Supplementary Table 1.** The inheritance frequencies of *Ae. tauschii* T093 alleles evaluated by 55K SNP array in derived BC<sub>1</sub>F<sub>1</sub>, BC<sub>2</sub>F<sub>1</sub> and BC<sub>3</sub>F<sub>1</sub> generation.

**See Excel file**

**Supplementary Table 2.** Summary of the genes with variations between *Ae. tauschii* T093 and the D subgenome of bread wheat AK58. A total of 16055 genes showed variations in coding sequence regions.

| Region         | Category          | SNP        |                | Indel   |                |
|----------------|-------------------|------------|----------------|---------|----------------|
|                |                   | Numbers    | Affected genes | Numbers | Affected genes |
| Intron         | -                 | 326,111    | 10,352         | 10,163  | 4,391          |
| Splicing sites | -                 | 236        | 250            | 61      | 63             |
|                | stop gain         | 621        | 567            | 101     | 99             |
|                | stop loss         | 226        | 221            | 5       | 5              |
| Exon           | synonymous SNV    | 35,541     | 10,382         | -       | -              |
|                | nonsynonymous SNV | 40,005     | 11,167         | -       | -              |
|                | nonframeshift     | -          | -              | 2,053   | 1,744          |
|                | frameshift        | -          | -              | 9,990   | 3,346          |
| Total          | -                 | 18,609,736 | 13,701         | 521,436 | 3,869          |

**Supplementary Table 3.** Statistics of introgressed fragment sizes in derived BC<sub>4</sub>F<sub>1</sub>, BC<sub>4</sub>F<sub>2</sub> and BC<sub>4</sub>F<sub>4</sub> generations.

**See Excel file**

**Supplementary Video 1.** A video file showing how to emasculate the spikes of *Ae. tauschii*.
