# Supplementary material for: A platform for whole-genome speed introgression from Aegilops tauschii to wheat for breeding future crops
Source: Springer Nature journal article supplement (doi:10.1038/s41596-023-00922-8), 2023-11-28
Supplement: MOESM4 [file 41596_2023_922_MOESM4_ESM14.xlsx]

## Sheet: Supplementary Table 1
Supplementary Table 1. The inheritance frequency of Ae. tauschii T093 alleles evaluated by 55K SNP array in derived BC1F1, BC2F1 and BC3F1 generation.
Number	Homozygous loci (same with AK58)	NA	Heterozygous loci	Valid SNPs	The inheritance frequency of Ae. tauschii T093 alleles	Generation
HG723	1022	375	749	1771	0.4229	BC1F1
HG724	319	544	1283	1602	0.8009	BC1F1
HG725	292	534	1320	1612	0.8189	BC1F1
HG726	321	543	1282	1603	0.7998	BC1F1
HG1971	999	40	803	1806	0.4446	BC2F1
HG1972	571	24	1247	1820	0.6852	BC2F1
HG1973	1008	12	822	1831	0.4489	BC2F1
HG1974	859	43	940	1800	0.5222	BC2F1
HG1975	1161	7	674	1837	0.3669	BC2F1
HG1976	940	35	867	1810	0.479	BC2F1
HG1977	644	82	1116	1783	0.6259	BC2F1
HG1978	1136	28	678	1814	0.3738	BC2F1
HG1979	626	121	1095	1743	0.6282	BC2F1
HG1980	899	30	913	1814	0.5033	BC2F1
HG1981	1325	12	505	1830	0.276	BC2F1
HG1982	964	28	850	1814	0.4686	BC2F1
HG1983	602	36	1204	1807	0.6663	BC2F1
HG1984	994	4	844	1839	0.4589	BC2F1
HG1985	759	20	1063	1823	0.5831	BC2F1
HG1986	742	32	1068	1810	0.5901	BC2F1
HG1987	815	34	993	1808	0.5492	BC2F1
HG1988	1086	9	747	1833	0.4075	BC2F1
HG1989	1150	30	662	1818	0.3641	BC2F1
HG1990	1100	52	690	1799	0.3835	BC2F1
HG1991	1032	28	782	1818	0.4301	BC2F1
HG1992	1387	8	447	1834	0.2437	BC2F1
HG1993	413	89	1340	1762	0.7605	BC2F1
HG1994	563	38	1241	1804	0.6879	BC2F1
HG1995	1005	26	811	1819	0.4458	BC2F1
HG1996	253	39	1550	1805	0.8587	BC2F1
HG1997	515	43	1284	1803	0.7121	BC2F1
HG1998	813	24	1005	1819	0.5525	BC2F1
HG1999	1087	18	737	1824	0.4041	BC2F1
HG2000	537	75	1230	1769	0.6953	BC2F1
HG4001	628	56	1158	1797	0.6444	BC2F1
HG4002	1318	51	473	1794	0.2637	BC2F1
HG4003	732	39	1071	1804	0.5937	BC2F1
HG4004	384	67	1391	1776	0.7832	BC2F1
HG4005	1443	4	395	1838	0.2149	BC2F1
HG4006	1409	20	413	1822	0.2267	BC2F1
HG4007	1127	30	685	1814	0.3776	BC2F1
HG4008	815	78	949	1764	0.538	BC2F1
HG4009	862	72	908	1772	0.5124	BC2F1
HG4830	1714	0	2	1716	0.0012	BC3F1
HG4851	1713	1	2	1715	0.0012	BC3F1
HG4856	1714	0	2	1716	0.0012	BC3F1
HG4858	1712	2	2	1714	0.0012	BC3F1
HG4876	1713	1	2	1715	0.0012	BC3F1
HG4987	1714	0	2	1716	0.0012	BC3F1
HG4824	1709	4	3	1712	0.0018	BC3F1
HG4821	1703	8	5	1708	0.0029	BC3F1
HG4860	1709	2	5	1714	0.0029	BC3F1
HG4971	1689	6	21	1710	0.0123	BC3F1
HG4754	1685	3	28	1713	0.0163	BC3F1
HG4977	1683	3	30	1713	0.0175	BC3F1
HG4809	1684	0	32	1716	0.0186	BC3F1
HG4874	1677	0	39	1716	0.0227	BC3F1
HG4844	1667	0	49	1716	0.0286	BC3F1
HG4871	1662	1	53	1715	0.0309	BC3F1
HG4808	1655	4	57	1712	0.0333	BC3F1
HG4742	1651	5	60	1711	0.0351	BC3F1
HG4914	1653	2	61	1714	0.0356	BC3F1
HG4965	1652	2	62	1714	0.0362	BC3F1
HG4823	1642	2	72	1714	0.042	BC3F1
HG4778	1635	0	81	1716	0.0472	BC3F1
HG4975	1629	1	86	1715	0.0501	BC3F1
HG4885	1613	5	98	1711	0.0573	BC3F1
HG4970	1615	2	99	1714	0.0578	BC3F1
HG4888	1611	5	100	1711	0.0584	BC3F1
HG4749	1611	4	101	1712	0.059	BC3F1
HG4744	1609	1	106	1715	0.0618	BC3F1
HG4884	1610	0	106	1716	0.0618	BC3F1
HG4946	1609	1	106	1715	0.0618	BC3F1
HG4724	1606	0	110	1716	0.0641	BC3F1
HG4732	1605	1	110	1715	0.0641	BC3F1
HG4780	1596	4	116	1712	0.0678	BC3F1
HG4764	1595	2	119	1714	0.0694	BC3F1
HG4721	1590	3	123	1713	0.0718	BC3F1
HG4875	1590	3	123	1713	0.0718	BC3F1
HG4831	1590	0	126	1716	0.0734	BC3F1
HG4986	1582	8	126	1708	0.0738	BC3F1
HG4954	1579	10	127	1706	0.0744	BC3F1
HG4920	1573	5	138	1711	0.0807	BC3F1
HG4962	1573	1	142	1715	0.0828	BC3F1
HG4789	1562	1	153	1715	0.0892	BC3F1
HG4918	1558	5	153	1711	0.0894	BC3F1
HG4976	1548	15	153	1701	0.0899	BC3F1
HG4942	1557	0	159	1716	0.0927	BC3F1
HG4739	1544	11	161	1705	0.0944	BC3F1
HG4919	1547	3	166	1713	0.0969	BC3F1
HG4782	1525	9	182	1707	0.1066	BC3F1
HG4969	1518	8	190	1708	0.1112	BC3F1
HG4968	1522	1	193	1715	0.1125	BC3F1
HG4863	1514	8	194	1708	0.1136	BC3F1
HG4835	1520	0	196	1716	0.1142	BC3F1
HG4748	1502	10	204	1706	0.1196	BC3F1
HG4753	1491	13	212	1703	0.1245	BC3F1
HG4756	1497	6	213	1710	0.1246	BC3F1
HG4966	1487	5	224	1711	0.1309	BC3F1
HG4814	1485	6	225	1710	0.1316	BC3F1
HG4924	1483	1	232	1715	0.1353	BC3F1
HG4949	1482	0	234	1716	0.1364	BC3F1
HG4777	1476	4	236	1712	0.1379	BC3F1
HG4741	1477	1	238	1715	0.1388	BC3F1
HG4883	1472	2	242	1714	0.1412	BC3F1
HG4868	1462	10	244	1706	0.143	BC3F1
HG4972	1465	6	245	1710	0.1433	BC3F1
HG4736	1464	1	251	1715	0.1464	BC3F1
HG4982	1460	2	254	1714	0.1482	BC3F1
HG4916	1446	5	265	1711	0.1549	BC3F1
HG4948	1448	1	267	1715	0.1557	BC3F1
HG4907	1443	2	271	1714	0.1581	BC3F1
HG4797	1439	6	271	1710	0.1585	BC3F1
HG4877	1441	2	273	1714	0.1593	BC3F1
HG4792	1437	5	274	1711	0.1601	BC3F1
HG4867	1425	18	273	1698	0.1608	BC3F1
HG4940	1433	5	278	1711	0.1625	BC3F1
HG4802	1427	10	279	1706	0.1635	BC3F1
HG4832	1402	34	280	1682	0.1665	BC3F1
HG4906	1430	0	286	1716	0.1667	BC3F1
HG4933	1411	18	287	1698	0.169	BC3F1
HG4779	1415	12	289	1704	0.1696	BC3F1
HG4722	1417	8	291	1708	0.1704	BC3F1
HG4757	1421	3	292	1713	0.1705	BC3F1
HG4947	1423	0	293	1716	0.1707	BC3F1
HG4889	1407	16	293	1700	0.1724	BC3F1
HG4941	1412	6	298	1710	0.1743	BC3F1
HG4768	1413	2	301	1714	0.1756	BC3F1
HG4763	1412	2	302	1714	0.1762	BC3F1
HG4786	1407	6	303	1710	0.1772	BC3F1
HG4783	1409	1	306	1715	0.1784	BC3F1
HG4928	1399	13	304	1703	0.1785	BC3F1
HG4826	1404	3	309	1713	0.1804	BC3F1
HG4745	1404	1	311	1715	0.1813	BC3F1
HG4873	1404	0	312	1716	0.1818	BC3F1
HG4893	1395	11	310	1705	0.1818	BC3F1
HG4804	1395	5	316	1711	0.1847	BC3F1
HG4894	1393	3	320	1713	0.1868	BC3F1
HG4929	1382	15	319	1701	0.1875	BC3F1
HG4761	1392	2	322	1714	0.1879	BC3F1
HG4833	1387	2	327	1714	0.1908	BC3F1
HG4807	1380	10	326	1706	0.1911	BC3F1
HG4746	1375	13	328	1703	0.1926	BC3F1
HG4945	1385	0	331	1716	0.1929	BC3F1
HG4973	1372	15	329	1701	0.1934	BC3F1
HG4915	1356	34	326	1682	0.1938	BC3F1
HG4795	1369	16	331	1700	0.1947	BC3F1
HG4747	1355	30	331	1686	0.1963	BC3F1
HG4852	1378	1	337	1715	0.1965	BC3F1
HG4838	1375	4	337	1712	0.1968	BC3F1
HG4872	1372	6	338	1710	0.1977	BC3F1
HG4943	1371	6	339	1710	0.1982	BC3F1
HG4774	1372	1	343	1715	0.2	BC3F1
HG4955	1356	21	339	1695	0.2	BC3F1
HG4751	1366	3	347	1713	0.2026	BC3F1
HG4952	1366	2	348	1714	0.203	BC3F1
HG4771	1363	3	350	1713	0.2043	BC3F1
HG4862	1336	35	345	1681	0.2052	BC3F1
HG4767	1360	1	355	1715	0.207	BC3F1
HG4985	1337	28	351	1688	0.2079	BC3F1
HG4829	1354	5	357	1711	0.2086	BC3F1
HG4772	1353	5	358	1711	0.2092	BC3F1
HG4922	1352	2	362	1714	0.2112	BC3F1
HG4963	1336	21	359	1695	0.2118	BC3F1
HG4803	1336	13	367	1703	0.2155	BC3F1
HG4817	1343	2	371	1714	0.2165	BC3F1
HG4737	1341	4	371	1712	0.2167	BC3F1
HG4923	1343	1	372	1715	0.2169	BC3F1
HG4861	1330	17	369	1699	0.2172	BC3F1
HG4910	1338	6	372	1710	0.2175	BC3F1
HG4913	1330	13	373	1703	0.219	BC3F1
HG4765	1337	3	376	1713	0.2195	BC3F1
HG4887	1311	34	371	1682	0.2206	BC3F1
HG4806	1322	19	375	1697	0.221	BC3F1
HG4760	1329	2	385	1714	0.2246	BC3F1
HG4718	1277	57	382	1659	0.2303	BC3F1
HG4866	1300	20	396	1696	0.2335	BC3F1
HG4938	1300	18	398	1698	0.2344	BC3F1
HG4752	1296	13	407	1703	0.239	BC3F1
HG4878	1293	13	410	1703	0.2408	BC3F1
HG4839	1300	1	415	1715	0.242	BC3F1
HG4959	1280	21	415	1695	0.2448	BC3F1
HG4717	1274	21	421	1695	0.2484	BC3F1
HG4787	1286	5	425	1711	0.2484	BC3F1
HG4892	1285	4	427	1712	0.2494	BC3F1
HG4881	1278	12	426	1704	0.25	BC3F1
HG4853	1282	6	428	1710	0.2503	BC3F1
HG4958	1281	2	433	1714	0.2526	BC3F1
HG4798	1259	31	426	1685	0.2528	BC3F1
HG4848	1279	1	436	1715	0.2542	BC3F1
HG4818	1273	5	438	1711	0.256	BC3F1
HG4784	1272	6	438	1710	0.2561	BC3F1
HG4758	1264	16	436	1700	0.2565	BC3F1
HG4716	1263	16	437	1700	0.2571	BC3F1
HG4989	1254	28	434	1688	0.2571	BC3F1
HG4781	1251	26	439	1690	0.2598	BC3F1
HG4793	1253	23	440	1693	0.2599	BC3F1
HG4841	1265	2	449	1714	0.262	BC3F1
HG4957	1261	7	448	1709	0.2621	BC3F1
HG4822	1253	17	446	1699	0.2625	BC3F1
HG4886	1254	14	448	1702	0.2632	BC3F1
HG4978	1260	5	451	1711	0.2636	BC3F1
HG4842	1260	3	453	1713	0.2644	BC3F1
HG4850	1257	5	454	1711	0.2653	BC3F1
HG4917	1239	28	449	1688	0.266	BC3F1
HG4837	1259	0	457	1716	0.2663	BC3F1
HG4843	1253	1	462	1715	0.2694	BC3F1
HG4980	1228	31	457	1685	0.2712	BC3F1
HG4979	1244	7	465	1709	0.2721	BC3F1
HG4953	1244	6	466	1710	0.2725	BC3F1
HG4762	1238	5	473	1711	0.2764	BC3F1
HG4801	1221	26	469	1690	0.2775	BC3F1
HG4759	1234	1	481	1715	0.2805	BC3F1
HG4882	1223	15	478	1701	0.281	BC3F1
HG4921	1230	5	481	1711	0.2811	BC3F1
HG4766	1227	2	487	1714	0.2841	BC3F1
HG4776	1219	7	490	1709	0.2867	BC3F1
HG4828	1219	4	493	1712	0.288	BC3F1
HG4854	1206	16	494	1700	0.2906	BC3F1
HG4902	1212	6	498	1710	0.2912	BC3F1
HG4869	1193	26	497	1690	0.2941	BC3F1
HG4805	1184	26	506	1690	0.2994	BC3F1
HG4864	1189	14	513	1702	0.3014	BC3F1
HG4857	1193	6	517	1710	0.3023	BC3F1
HG4847	1194	3	519	1713	0.303	BC3F1
HG4738	1188	7	521	1709	0.3049	BC3F1
HG4799	1173	28	515	1688	0.3051	BC3F1
HG4788	1171	24	521	1692	0.3079	BC3F1
HG4904	1183	6	527	1710	0.3082	BC3F1
HG4932	1177	12	527	1704	0.3093	BC3F1
HG4729	1179	4	533	1712	0.3113	BC3F1
HG4743	1177	0	539	1716	0.3141	BC3F1
HG4988	1151	32	533	1684	0.3165	BC3F1
HG4816	1161	12	543	1704	0.3187	BC3F1
HG4800	1152	21	543	1695	0.3204	BC3F1
HG4769	1162	5	549	1711	0.3209	BC3F1
HG4896	1153	3	560	1713	0.3269	BC3F1
HG4960	1139	18	559	1698	0.3292	BC3F1
HG4846	1147	0	569	1716	0.3316	BC3F1
HG4849	1136	16	564	1700	0.3318	BC3F1
HG4790	1133	9	574	1707	0.3363	BC3F1
HG4855	1129	15	572	1701	0.3363	BC3F1
HG4936	1119	19	578	1697	0.3406	BC3F1
HG4794	1108	22	586	1694	0.3459	BC3F1
HG4898	1108	4	604	1712	0.3528	BC3F1
HG4733	1099	13	604	1703	0.3547	BC3F1
HG4950	1100	7	609	1709	0.3563	BC3F1
HG4859	1097	1	618	1715	0.3603	BC3F1
HG4927	1087	13	616	1703	0.3617	BC3F1
HG4900	1070	38	608	1678	0.3623	BC3F1
HG4937	1085	10	621	1706	0.364	BC3F1
HG4726	1085	7	624	1709	0.3651	BC3F1
HG4813	1086	4	626	1712	0.3657	BC3F1
HG4836	1085	1	630	1715	0.3673	BC3F1
HG4912	1066	29	621	1687	0.3681	BC3F1
HG4723	1048	54	614	1662	0.3694	BC3F1
HG4908	1063	21	632	1695	0.3729	BC3F1
HG4734	1060	13	643	1703	0.3776	BC3F1
HG4731	1064	5	647	1711	0.3781	BC3F1
HG4811	1053	8	655	1708	0.3835	BC3F1
HG4939	1032	29	655	1687	0.3883	BC3F1
HG4934	1025	21	670	1695	0.3953	BC3F1
HG4735	1025	7	684	1709	0.4002	BC3F1
HG4926	1001	24	691	1692	0.4084	BC3F1
HG4951	1002	16	698	1700	0.4106	BC3F1
HG4796	989	37	690	1679	0.411	BC3F1
HG4931	977	50	689	1666	0.4136	BC3F1
HG4827	975	14	727	1702	0.4271	BC3F1
HG4909	972	12	732	1704	0.4296	BC3F1
HG4903	920	28	768	1688	0.455	BC3F1
HG4964	908	27	781	1689	0.4624	BC3F1
HG4727	896	5	815	1711	0.4763	BC3F1
HG4899	891	4	821	1712	0.4796	BC3F1
HG4956	866	18	832	1698	0.49	BC3F1
HG4728	817	8	891	1708	0.5217	BC3F1
HG4891	681	18	1017	1698	0.5989	BC3F1
HG4930	653	44	1019	1672	0.6094	BC3F1
HG4901	528	20	1168	1696	0.6887	BC3F1
