# Supplementary material for: A platform for whole-genome speed introgression from Aegilops tauschii to wheat for breeding future crops
Source: Springer Nature journal article supplement (doi:10.1038/s41596-023-00922-8), 2023-11-28
Supplement: MOESM5 [file 41596_2023_922_MOESM5_ESM15.xlsx]

## Sheet: Supplementary Table 3
Supplementary Table 3. Statistics of introgressed fragment size in derived BC4F1, BC4F1 and BC4F4 generation.
Generation	Sample	Chromosome	Start (bp)	End(bp)	Length (Mb)	Condition
BC4F1	AT397	chr2D	10161513	26794399	16.6329	HET
BC4F1	AT397	chr2D	38040011	572298883	534.259	HET
BC4F1	AT397	chr3D	4495085	625482706	620.988	HET
BC4F1	AT397	chr4D	519735108	523921856	4.18675	HET
BC4F1	AT397	chr5D	574220395	575438856	1.21846	HET
BC4F1	AT397	chr6D	726999	33612111	32.8851	HET
BC4F1	AT397	chr6D	34818276	483929633	449.111	HET
BC4F1	AT398	chr2D	471736154	572298883	100.563	HET
BC4F1	AT398	chr3D	4495085	11672219	7.17713	HET
BC4F1	AT398	chr3D	618595970	625482706	6.88674	HET
BC4F1	AT398	chr4D	29392905	504756442	475.364	HET
BC4F1	AT398	chr5D	574220395	575438856	1.21846	HET
BC4F1	AT398	chr6D	726999	4930021	4.20302	HET
BC4F1	AT398	chr6D	34818276	466154103	431.336	HET
BC4F1	AT399	chr2D	10161513	26794399	16.6329	HET
BC4F1	AT399	chr2D	38040011	572795534	534.756	HET
BC4F1	AT399	chr3D	4495085	29421807	24.9267	HET
BC4F1	AT399	chr3D	520531122	609278674	88.7476	HET
BC4F1	AT399	chr4D	29392905	523921856	494.529	HET
BC4F1	AT399	chr6D	12458428	33612111	21.1537	HET
BC4F1	AT399	chr6D	34818276	483929633	449.111	HET
BC4F1	AT405	chr2D	38040011	572795534	534.756	HET
BC4F1	AT405	chr3D	4495085	32596121	28.101	HET
BC4F1	AT405	chr3D	622867414	625482706	2.61529	HET
BC4F1	AT405	chr6D	461669368	483929633	22.2603	HET
BC4F1	AT565	chr2D	130278248	449008716	318.73	HET
BC4F1	AT6360	chr1D	379322619	473598402	94.2758	HET
BC4F1	AT6360	chr2D	10444574	26062536	15.618	HET
BC4F1	AT6360	chr4D	31380503	491918180	460.538	HET
BC4F1	AT6360	chr7D	570093704	592934888	22.8412	HET
BC4F1	AT6416	chr2D	10444574	26062536	15.618	HET
BC4F1	AT6416	chr4D	31380503	491918180	460.538	HET
BC4F1	AT6416	chr5D	1251811	348575212	347.323	HET
BC4F1	AT6416	chr5D	422772028	564373107	141.601	HET
BC4F1	AT6416	chr6D	4147603	34982318	30.8347	HET
BC4F1	AT6417	chr2D	10444574	26062536	15.618	HET
BC4F1	AT6417	chr4D	31380503	491918180	460.538	HET
BC4F1	AT6417	chr5D	1251811	348575212	347.323	HET
BC4F1	AT6417	chr5D	422772028	564373107	141.601	HET
BC4F1	AT6417	chr6D	2067195	34982318	32.9151	HET
BC4F1	AT6561	chr2D	40165965	572951791	532.786	HET
BC4F1	AT6561	chr3D	5569574	626817931	621.248	HET
BC4F1	AT6561	chr4D	33768	3767784	3.73402	HET
BC4F1	AT6561	chr4D	33834222	525578003	491.744	HET
BC4F1	AT6561	chr6D	13792789	34982318	21.1895	HET
BC4F1	AT6562	chr2D	11187101	26976909	15.7898	HET
BC4F1	AT6562	chr2D	518352953	572951791	54.5988	HET
BC4F1	AT6562	chr3D	5569574	609278674	603.709	HET
BC4F1	AT6562	chr6D	37009630	485948725	448.939	HET
BC4F1	AT6563	chr2D	11187101	27217466	16.0304	HET
BC4F1	AT6563	chr2D	40165965	572951791	532.786	HET
BC4F1	AT6563	chr4D	31380503	496305519	464.925	HET
BC4F1	AT6563	chr6D	13412581	34982318	21.5697	HET
BC4F1	AT6563	chr6D	37009630	485948725	448.939	HET
BC4F1	AT6666	chr1D	6122979	63072109	56.9491	HET
BC4F1	AT6666	chr2D	595339041	602736637	7.3976	HET
BC4F1	AT6666	chr5D	422483157	464162834	41.6797	HET
BC4F1	AT6666	chr7D	835809	16471466	15.6357	HET
BC4F1	AT6666	chr7D	47619988	60851900	13.2319	HET
BC4F1	AT6668	chr1D	3169475	62577615	59.4081	HET
BC4F1	AT6668	chr2D	595339041	602736637	7.3976	HET
BC4F1	AT6668	chr2D	634006496	650809981	16.8035	HET
BC4F1	AT6668	chr5D	422483157	464787385	42.3042	HET
BC4F1	AT6668	chr7D	835809	60851900	60.0161	HET
BC4F1	AT6669	chr1D	3381767	12147545	8.76578	HET
BC4F1	AT6669	chr2D	634006496	650809981	16.8035	HET
BC4F1	AT6669	chr5D	422483157	464787385	42.3042	HET
BC4F1	AT6669	chr6D	8218996	11146052	2.92706	HET
BC4F1	AT6670	chr2D	431303218	449370727	18.0675	HET
BC4F1	AT6670	chr2D	634006496	650809981	16.8035	HET
BC4F1	AT6670	chr5D	422483157	464787385	42.3042	HET
BC4F1	AT6670	chr6D	638440	11146052	10.5076	HET
BC4F1	AT6672	chr2D	633734756	644587444	10.8527	HET
BC4F1	AT6672	chr5D	422483157	463445088	40.9619	HET
BC4F1	AT6672	chr6D	638440	11146052	10.5076	HET
BC4F1	AT6672	chr7D	835809	37574749	36.7389	HET
BC4F1	AT7021	chr5D	421255962	482643933	61.388	HET
BC4F1	AT7021	chr6D	8096198	33612111	25.5159	HET
BC4F1	AT7021	chr6D	38409301	108159886	69.7506	HET
BC4F1	AT7021	chr7D	106377460	207749225	101.372	HET
BC4F1	AT7024	chr3D	615647458	625482706	9.83525	HET
BC4F1	AT7024	chr4D	380205285	501406478	121.201	HET
BC4F1	AT7024	chr5D	421255962	482643933	61.388	HET
BC4F1	AT7024	chr5D	561817227	570162307	8.34508	HET
BC4F1	AT7024	chr6D	726999	33612111	32.8851	HET
BC4F1	AT7024	chr6D	34818276	107754554	72.9363	HET
BC4F1	AT7024	chr7D	106377460	207722337	101.345	HET
BC4F1	AT7024	chr7D	550842493	645031549	94.1891	HET
BC4F1	AT7026	chr4D	435132211	501406478	66.2743	HET
BC4F1	AT7026	chr5D	421019188	482643933	61.6247	HET
BC4F1	AT7026	chr5D	561556683	575438856	13.8822	HET
BC4F1	AT7026	chr6D	15393256	33612111	18.2189	HET
BC4F1	AT7026	chr6D	38409301	108159886	69.7506	HET
BC4F1	AT7026	chr7D	106377460	207722337	101.345	HET
BC4F1	AT7027	chr3D	680724	6703373	6.02265	HET
BC4F1	AT7027	chr3D	615647458	625482706	9.83525	HET
BC4F1	AT7027	chr4D	380205285	501406478	121.201	HET
BC4F1	AT7027	chr5D	421255962	482643933	61.388	HET
BC4F1	AT7027	chr6D	638440	15489627	14.8512	HET
BC4F1	AT7027	chr7D	106377460	207749225	101.372	HET
BC4F1	AT7027	chr7D	550336020	619351799	69.0158	HET
BC4F1	AT7192	chr1D	65045	12083643	12.0186	HET
BC4F1	AT7192	chr1D	474377256	496740874	22.3636	HET
BC4F1	AT7192	chr2D	18596	531638590	531.62	HET
BC4F1	AT7192	chr2D	612671268	636295436	23.6242	HET
BC4F1	AT7192	chr5D	279330909	312333294	33.0024	HET
BC4F1	AT7192	chr5D	422772028	576970105	154.198	HET
BC4F1	AT7192	chr6D	14661	3164539	3.14988	HET
BC4F1	AT7193	chr2D	18596	531638590	531.62	HET
BC4F1	AT7193	chr5D	279330909	311980923	32.65	HET
BC4F1	AT7193	chr5D	423123401	576970105	153.847	HET
BC4F1	AT7193	chr6D	14661	7894831	7.88017	HET
BC4F1	AT7252	chr2D	18596	626812455	626.794	HET
BC4F1	AT7252	chr5D	1251811	348575212	347.323	HET
BC4F1	AT7252	chr6D	2067195	12168425	10.1012	HET
BC4F1	AT7252	chr7D	2609081	65872681	63.2636	HET
BC4F1	AT7253	chr1D	486444353	496740874	10.2965	HET
BC4F1	AT7253	chr2D	18596	658110955	658.092	HET
BC4F1	AT7253	chr3D	71612	1978248	1.90664	HET
BC4F1	AT7253	chr3D	8739485	29122925	20.3834	HET
BC4F1	AT7253	chr4D	64630790	519321286	454.69	HET
BC4F1	AT7253	chr5D	7823377	348575212	340.752	HET
BC4F1	AT7253	chr5D	570158538	576970105	6.81157	HET
BC4F1	AT7253	chr6D	14661	12168425	12.1538	HET
BC4F1	AT7253	chr7D	2609081	65872681	63.2636	HET
BC4F1	AT7553	chr1D	65045	22686268	22.6212	HET
BC4F1	AT7553	chr2D	18596	67609948	67.5914	HET
BC4F1	AT7553	chr4D	507100442	525578003	18.4776	HET
BC4F1	AT7553	chr5D	1251811	9230376	7.97856	HET
BC4F1	AT7557	chr1D	65045	22686268	22.6212	HET
BC4F1	AT7557	chr2D	18596	67609948	67.5914	HET
BC4F1	AT7557	chr3D	71612	21457089	21.3855	HET
BC4F1	AT7557	chr3D	44110806	72263038	28.1522	HET
BC4F1	AT8020	chr4D	64630790	509574399	444.944	HET
BC4F1	AT8020	chr5D	471027636	576970105	105.942	HET
BC4F1	AT8020	chr6D	14661	3164539	3.14988	HET
BC4F1	AT8308	chr1D	24228082	418423196	394.195	HET
BC4F1	AT8308	chr1D	436871625	468921160	32.0495	HET
BC4F1	AT8308	chr2D	549461084	658110955	108.65	HET
BC4F1	AT8308	chr3D	71612	2052838	1.98123	HET
BC4F1	AT8308	chr4D	462857738	508338508	45.4808	HET
BC4F1	AT8308	chr5D	489488381	576970105	87.4817	HET
BC4F1	AT8308	chr6D	14661	3164539	3.14988	HET
BC4F1	AT8308	chr6D	46182940	488182093	441.999	HET
BC4F1	AT8308	chr7D	97313799	580351366	483.038	HET
BC4F1	AT8322	chr1D	65045	11865556	11.8005	HET
BC4F1	AT8322	chr1D	24228082	418423196	394.195	HET
BC4F1	AT8322	chr2D	18596	485444348	485.426	HET
BC4F1	AT8322	chr2D	549427679	658110955	108.683	HET
BC4F1	AT8322	chr3D	71612	1978248	1.90664	HET
BC4F1	AT8322	chr6D	459044504	488182093	29.1376	HET
BC4F1	AT8322	chr7D	196160491	619542441	423.382	HET
BC4F1	AT8498	chr2D	458938778	635987845	177.049	HET
BC4F1	AT8498	chr5D	381817800	435868119	54.0503	HET
BC4F1	AT8500	chr2D	74345602	145247887	70.9023	HET
BC4F1	AT8500	chr2D	449007717	591368060	142.36	HET
BC4F1	AT8500	chr2D	594187151	656234834	62.0477	HET
BC4F1	AT8500	chr5D	399081137	477588440	78.5073	HET
BC4F1	AT8500	chr7D	599527158	645031549	45.5044	HET
BC4F1	AT8501	chr2D	74517850	603541009	529.023	HET
BC4F1	AT8501	chr5D	381817800	477588440	95.7706	HET
BC4F1	AT8501	chr7D	599527158	645031549	45.5044	HET
BC4F1	AT8611	chr1D	65045	11865556	11.8005	HET
BC4F1	AT8612	chr2D	552066673	638240828	86.1742	HET
BC4F1	AT8613	chr2D	654938945	658110955	3.17201	HET
BC4F1	AT8614	chr3D	71612	1978248	1.90664	HET
BC4F1	AT8615	chr5D	410147163	438793286	28.6461	HET
BC4F1	AT8616	chr5D	448800858	477782701	28.9818	HET
BC4F1	AT8617	chr5D	568290036	576970105	8.68007	HET
BC4F1	AT8618	chr6D	14661	3164539	3.14988	HET
BC4F2	AT10020	chr2D	16382667	43628656	27.246	HET
BC4F2	AT10480	chr2D	18596	57093260	57.0747	HET
BC4F2	AT10480	chr2D	5691199	67323403	61.6322	HOM
BC4F2	AT10480	chr4D	507100442	520465091	13.3646	HOM
BC4F2	AT10480	chr7D	111298358	184587508	73.2892	HET
BC4F2	AT10559	chr2D	18596	32748873	32.7303	HET
BC4F2	AT10559	chr2D	23366639	67323403	43.9568	HOM
BC4F2	AT10559	chr4D	507100442	525578003	18.4776	HOM
BC4F2	AT10559	chr4D	508094791	525578003	17.4832	HET
BC4F2	AT10559	chr5D	1251811	7892306	6.64049	HOM
BC4F2	AT10568	chr1D	65045	4907770	4.84272	HOM
BC4F2	AT10568	chr2D	450051	67323403	66.8734	HOM
BC4F2	AT10568	chr2D	2378999	59740376	57.3614	HET
BC4F2	AT10568	chr4D	507100442	525578003	18.4776	HOM
BC4F2	AT10568	chr4D	508192224	525578003	17.3858	HET
BC4F2	AT10568	chr5D	1251811	7892306	6.64049	HOM
BC4F2	AT10568	chr5D	450713800	457272078	6.55828	HOM
BC4F2	AT10568	chr5D	453036534	506658500	53.622	HET
BC4F2	AT10573	chr1D	65045	20863068	20.798	HET
BC4F2	AT10573	chr1D	65045	22686268	22.6212	HOM
BC4F2	AT10573	chr2D	450051	67323403	66.8734	HOM
BC4F2	AT10573	chr2D	2201027	58297820	56.0968	HET
BC4F2	AT10573	chr3D	71612	72263038	72.1914	HET
BC4F2	AT10584	chr1D	65045	42171017	42.106	HET
BC4F2	AT10584	chr1D	65045	18040795	17.9758	HOM
BC4F2	AT10584	chr2D	18596	64615583	64.597	HET
BC4F2	AT10584	chr3D	71612	28387266	28.3157	HET
BC4F2	AT10584	chr5D	478219804	506658500	28.4387	HET
BC4F2	AT10584	chr7D	57591038	93278486	35.6874	HOM
BC4F2	AT10584	chr7D	60745790	94438063	33.6923	HET
BC4F2	AT10584	chr7D	109805169	580667697	470.863	HOM
BC4F2	AT10584	chr7D	118268371	643602545	525.334	HET
BC4F2	AT10584	chr7D	619216819	628756462	9.53964	HOM
BC4F2	AT10594	chr1D	65045	406586938	406.522	HET
BC4F2	AT10594	chr1D	65045	11526898	11.4619	HOM
BC4F2	AT10594	chr2D	18596	67609948	67.5914	HET
BC4F2	AT10595	chr1D	5992330	406586938	400.595	HET
BC4F2	AT10595	chr2D	450051	28017163	27.5671	HOM
BC4F2	AT10595	chr2D	1860623	63956279	62.0957	HET
BC4F2	AT10595	chr5D	478219804	506658500	28.4387	HET
BC4F2	AT10595	chr7D	48843601	81686667	32.8431	HOM
BC4F2	AT10595	chr7D	51833468	95568571	43.7351	HET
BC4F2	AT10595	chr7D	111298358	645031549	533.733	HET
BC4F2	AT10595	chr7D	527379595	645031549	117.652	HOM
BC4F2	AT10623	chr1D	65045	21871919	21.8069	HET
BC4F2	AT10623	chr2D	630703	59913917	59.2832	HET
BC4F2	AT10623	chr2D	630703	67323403	66.6927	HOM
BC4F2	AT10623	chr3D	16838386	32234738	15.3964	HET
BC4F2	AT10623	chr7D	110585218	517559665	406.974	HET
BC4F2	AT10633	chr2D	13016019	67323403	54.3074	HOM
BC4F2	AT10633	chr2D	14071835	57635271	43.5634	HET
BC4F2	AT10633	chr3D	49208704	135677867	86.4692	HOM
BC4F2	AT10633	chr3D	51360517	131851393	80.4909	HET
BC4F2	AT10633	chr4D	507100442	525578003	18.4776	HOM
BC4F2	AT10633	chr4D	508192224	525578003	17.3858	HET
BC4F2	AT10633	chr5D	1251811	7892306	6.64049	HOM
BC4F2	AT10633	chr7D	111298358	587199398	475.901	HET
BC4F2	AT10633	chr7D	179506307	590811404	411.305	HOM
BC4F2	AT11019	chr1D	65045	8511463	8.44642	HET
BC4F2	AT11019	chr4D	16205325	130408984	114.204	HOM
BC4F2	AT11019	chr4D	17076343	125511758	108.435	HET
BC4F2	AT11019	chr5D	448190389	504456216	56.2658	HOM
BC4F2	AT11019	chr5D	450189415	504738385	54.549	HET
BC4F2	AT11020	chr1D	381894227	473992926	92.0987	HOM
BC4F2	AT11020	chr1D	383824528	473714872	89.8903	HET
BC4F2	AT11020	chr4D	16205325	135078156	118.873	HET
BC4F2	AT11020	chr7D	586523688	645031549	58.5079	HOM
BC4F2	AT11020	chr7D	594307207	645031549	50.7243	HET
BC4F2	AT11328	chr1D	441357012	476130310	34.7733	HET
BC4F2	AT11328	chr4D	9858042	395082727	385.225	HET
BC4F2	AT11328	chr5D	380562538	438793286	58.2307	HET
BC4F2	AT11328	chr5D	449068032	460648079	11.58	HET
BC4F2	AT11328	chr5D	494137318	547395591	53.2583	HET
BC4F2	AT11328	chr6D	46133770	348559627	302.426	HOM
BC4F2	AT11328	chr6D	48114650	348559627	300.445	HET
BC4F2	AT11335	chr4D	9768499	395082727	385.314	HET
BC4F2	AT11355	chr2D	552066673	636295436	84.2288	HET
BC4F2	AT11355	chr4D	4247332	501284285	497.037	HET
BC4F2	AT11355	chr7D	48934734	645031549	596.097	HET
BC4F2	AT11355	chr7D	120675839	635254836	514.579	HOM
BC4F2	AT11402	chr1D	65045	11865556	11.8005	HET
BC4F2	AT11402	chr1D	65045	10474156	10.4091	HOM
BC4F2	AT11402	chr4D	6701912	466583146	459.881	HOM
BC4F2	AT11402	chr4D	8236047	462675553	454.44	HET
BC4F2	AT11402	chr5D	496335796	506658500	10.3227	HET
BC4F2	AT11402	chr6D	46133770	482264367	436.131	HET
BC4F2	AT11415	chr1D	65045	11434781	11.3697	HET
BC4F2	AT11415	chr1D	65045	11678605	11.6136	HOM
BC4F2	AT11415	chr4D	33768	469546239	469.512	HET
BC4F2	AT11415	chr4D	13871466	387459189	373.588	HOM
BC4F2	AT11415	chr5D	380562538	434916249	54.3537	HET
BC4F2	AT11415	chr6D	46133770	455736630	409.603	HOM
BC4F2	AT11415	chr6D	49624430	482404477	432.78	HET
BC4F2	AT11553	chr1D	19401343	490111239	470.71	HET
BC4F2	AT11553	chr1D	417414976	482304754	64.8898	HOM
BC4F2	AT11553	chr4D	1625723	525578003	523.952	HOM
BC4F2	AT11553	chr4D	3903184	5005815	1.10263	HET
BC4F2	AT11553	chr5D	1251811	7892306	6.64049	HOM
BC4F2	AT11553	chr7D	173014122	241731280	68.7172	HOM
BC4F2	AT11553	chr7D	191502396	237935954	46.4336	HET
BC4F2	AT11577	chr5D	460297261	506658500	46.3612	HET
BC4F2	AT11881	chr2D	18596	32488734	32.4701	HET
BC4F2	AT11881	chr2D	25784658	33204901	7.42024	HOM
BC4F2	AT11881	chr7D	48843601	255144358	206.301	HOM
BC4F2	AT11881	chr7D	54597840	578463798	523.866	HET
BC4F2	AT11883	chr2D	8704773	120722074	112.017	HOM
BC4F2	AT11883	chr2D	10444574	119056533	108.612	HET
BC4F2	AT11883	chr2D	573611277	658110955	84.4997	HET
BC4F2	AT11883	chr3D	71612	2052838	1.98123	HET
BC4F2	AT11883	chr7D	67130686	573928529	506.798	HET
BC4F2	AT11883	chr7D	527846801	574286294	46.4395	HOM
BC4F2	AT11921	chr2D	14626070	119867902	105.242	HET
BC4F2	AT11921	chr2D	20414027	120382373	99.9683	HOM
BC4F2	AT11921	chr3D	71612	6703373	6.63176	HET
BC4F2	AT11921	chr3D	450613655	536373910	85.7603	HET
BC4F2	AT11921	chr4D	14031824	109820930	95.7891	HOM
BC4F2	AT11921	chr4D	16488183	104237647	87.7495	HET
BC4F2	AT11928	chr2D	14626070	121185536	106.559	HET
BC4F2	AT11928	chr3D	17537552	116047691	98.5101	HET
BC4F2	AT11928	chr3D	621721458	626817931	5.09647	HET
BC4F2	AT11928	chr4D	33768	3767784	3.73402	HET
BC4F2	AT11928	chr4D	15189614	510106616	494.917	HET
BC4F2	AT11928	chr4D	449766949	491968471	42.2015	HOM
BC4F2	AT11928	chr5D	422772028	438670534	15.8985	HET
BC4F2	AT11928	chr5D	448800858	512814086	64.0132	HET
BC4F2	AT11928	chr5D	522355322	529152306	6.79698	HOM
BC4F2	AT11928	chr5D	523598998	560297156	36.6982	HET
BC4F2	AT11928	chr6D	94987687	498455506	403.468	HET
BC4F2	AT11928	chr6D	455996823	496891858	40.895	HOM
BC4F2	AT12009	chr4D	280784	6095420	5.81464	HOM
BC4F2	AT12009	chr7D	48934734	88564454	39.6297	HET
BC4F2	AT12336	chr1D	6684799	11865556	5.18076	HOM
BC4F2	AT12336	chr4D	33768	354387737	354.354	HET
BC4F2	AT12336	chr6D	67303861	450862735	383.559	HET
BC4F2	AT12336	chr7D	628248371	645031549	16.7832	HET
BC4F2	AT12357	chr1D	65045	11865556	11.8005	HET
BC4F2	AT12357	chr4D	16205325	485219029	469.014	HET
BC4F2	AT12357	chr5D	395776484	477588440	81.812	HET
BC4F2	AT12357	chr6D	45719552	102691573	56.972	HOM
BC4F2	AT12357	chr6D	52441002	97424482	44.9835	HET
BC4F2	AT12368	chr2D	18596	29689477	29.6709	HET
BC4F2	AT12368	chr2D	44108736	553217186	509.108	HET
BC4F2	AT12368	chr7D	111298358	429131135	317.833	HET
BC4F2	AT12368	chr7D	629700682	645031549	15.3309	HOM
BC4F2	AT12372	chr1D	65045	11865556	11.8005	HET
BC4F2	AT12372	chr2D	18596	31148246	31.1297	HET
BC4F2	AT12372	chr2D	44108736	658110955	614.002	HET
BC4F2	AT12372	chr3D	71612	2611477	2.53986	HET
BC4F2	AT12372	chr3D	8928460	35279789	26.3513	HET
BC4F2	AT12372	chr7D	111298358	429131135	317.833	HET
BC4F2	AT12453	chr7D	86224143	178381682	92.1575	HOM
BC4F2	AT12453	chr7D	89953939	171592672	81.6387	HET
BC4F2	AT12515	chr3D	71612	13094151	13.0225	HET
BC4F2	AT12515	chr4D	280784	33137451	32.8567	HOM
BC4F2	AT12515	chr4D	3511554	31409122	27.8976	HET
BC4F2	AT12515	chr7D	12798862	51836789	39.0379	HOM
BC4F2	AT12515	chr7D	17605400	53457479	35.8521	HET
BC4F2	AT12824	chr3D	113335536	609817814	496.482	HET
BC4F2	AT12824	chr4D	33768	15508586	15.4748	HET
BC4F2	AT12824	chr5D	6946099	356338124	349.392	HET
BC4F2	AT13179	chr1D	2879648	22686268	19.8066	HET
BC4F2	AT13179	chr2D	15095219	81656401	66.5612	HOM
BC4F2	AT13179	chr2D	17489361	78827354	61.338	HET
BC4F2	AT13179	chr2D	625941228	658110955	32.1697	HET
BC4F2	AT13179	chr3D	71612	1978248	1.90664	HET
BC4F2	AT13180	chr2D	31004985	444062336	413.057	HET
BC4F2	AT13180	chr2D	132669855	449370727	316.701	HOM
BC4F2	AT13180	chr2D	597084494	637197403	40.1129	HET
BC4F2	AT13180	chr2D	603538856	637426918	33.8881	HOM
BC4F2	AT13180	chr2D	652887511	658110955	5.22344	HOM
BC4F2	AT13180	chr3D	71612	1927335	1.85572	HOM
BC4F2	AT13180	chr5D	453249916	462078975	8.82906	HET
BC4F2	AT13509	chr2D	18596	57635271	57.6167	HET
BC4F2	AT13509	chr2D	6848740	67323403	60.4747	HOM
BC4F2	AT13509	chr5D	494137318	506658500	12.5212	HET
BC4F2	AT13509	chr7D	48843601	72358561	23.515	HOM
BC4F2	AT13509	chr7D	54597840	71297516	16.6997	HET
BC4F2	AT13509	chr7D	110585218	645031549	534.446	HET
BC4F2	AT13509	chr7D	624430547	645031549	20.601	HOM
BC4F2	AT13539	chr2D	450051	26976909	26.5269	HET
BC4F2	AT13539	chr2D	450051	28424846	27.9748	HOM
BC4F2	AT13539	chr3D	58568899	71752408	13.1835	HET
BC4F2	AT13633	chr3D	606572315	620840157	14.2678	HET
BC4F2	AT13633	chr7D	114127086	627294982	513.168	HOM
BC4F2	AT13633	chr7D	130237953	632732152	502.494	HET
BC4F2	AT13668	chr1D	65045	11865556	11.8005	HET
BC4F2	AT13668	chr5D	391418058	438793286	47.3752	HET
BC4F2	AT13668	chr5D	448800858	506658500	57.8576	HET
BC4F2	AT13668	chr7D	111298358	645031549	533.733	HET
BC4F2	AT13668	chr7D	188587645	605731646	417.144	HOM
BC4F2	AT13668	chr7D	624349994	645031549	20.6816	HOM
BC4F2	AT13949	chr2D	614129666	638240828	24.1112	HET
BC4F2	AT13949	chr2D	641819165	658110955	16.2918	HET
BC4F2	AT13949	chr3D	71612	30698342	30.6267	HET
BC4F2	AT13949	chr4D	64630790	130408984	65.7782	HOM
BC4F2	AT13949	chr4D	72220102	111196371	38.9763	HET
BC4F2	AT13949	chr7D	111298358	630516303	519.218	HET
BC4F2	AT14012	chr4D	16402514	466583146	450.181	HOM
BC4F2	AT14012	chr4D	19537196	460305809	440.769	HET
BC4F2	AT14012	chr6D	456481535	480776386	24.2949	HOM
BC4F2	AT14012	chr6D	457558814	479500613	21.9418	HET
BC4F2	AT14012	chr7D	166663689	552588527	385.925	HET
BC4F2	AT14060	chr2D	8704773	80724929	72.0202	HOM
BC4F2	AT14060	chr2D	11234156	78511416	67.2773	HET
BC4F2	AT14060	chr7D	126197131	538240945	412.044	HOM
BC4F2	AT14060	chr7D	137667150	621114198	483.447	HET
BC4F2	AT14062	chr2D	8769851	81132901	72.3631	HET
BC4F2	AT14062	chr7D	126197131	618575439	492.378	HOM
BC4F2	AT14062	chr7D	134495526	618761641	484.266	HET
BC4F2	AT14138	chr2D	591816395	623692946	31.8766	HOM
BC4F2	AT14138	chr2D	593638961	638240828	44.6019	HET
BC4F2	AT14138	chr2D	641819165	658110955	16.2918	HET
BC4F2	AT14138	chr3D	71612	1978248	1.90664	HET
BC4F2	AT14138	chr4D	8309861	40180326	31.8705	HOM
BC4F2	AT14138	chr4D	9587581	37367269	27.7797	HET
BC4F2	AT14138	chr7D	195715862	608271426	412.556	HOM
BC4F2	AT14138	chr7D	222544577	608271426	385.727	HET
BC4F2	AT14726	chr7D	48843601	513592953	464.749	HOM
BC4F2	AT14726	chr7D	54597840	645031549	590.434	HET
BC4F2	AT9007	chr2D	11187101	26976909	15.7898	HET
BC4F2	AT9007	chr2D	15434398	22547279	7.11288	HOM
BC4F2	AT9007	chr2D	40165965	500194198	460.028	HET
BC4F2	AT9007	chr2D	567071130	572951791	5.88066	HET
BC4F2	AT9007	chr3D	445794152	626817931	181.024	HET
BC4F2	AT9007	chr4D	33768	3767784	3.73402	HET
BC4F2	AT9007	chr4D	520979208	525578003	4.59879	HET
BC4F2	AT9007	chr5D	1251811	9230376	7.97856	HET
BC4F2	AT9007	chr5D	575362749	576970105	1.60736	HOM
BC4F2	AT9007	chr6D	14661	1936645	1.92198	HOM
BC4F2	AT9007	chr6D	13579667	34982318	21.4027	HET
BC4F2	AT9007	chr6D	58711603	484441610	425.73	HET
BC4F2	AT9007	chr6D	465296830	483894008	18.5972	HOM
BC4F2	AT9059	chr4D	14031824	509676964	495.645	HET
BC4F2	AT9059	chr4D	17389046	508919592	491.531	HOM
BC4F2	AT9059	chr5D	380497260	403745057	23.2478	HOM
BC4F2	AT9059	chr5D	381817800	403926100	22.1083	HET
BC4F2	AT9059	chr6D	453352012	498613828	45.2618	HET
BC4F2	AT9059	chr7D	466528656	552588527	86.0599	HET
BC4F2	AT9064	chr1D	24228082	417908240	393.68	HOM
BC4F2	AT9064	chr1D	26809547	417610762	390.801	HET
BC4F2	AT9064	chr2D	25382853	485444348	460.061	HET
BC4F2	AT9064	chr2D	549427679	658110955	108.683	HET
BC4F2	AT9064	chr2D	604793050	658110955	53.3179	HOM
BC4F2	AT9064	chr4D	12562500	505941818	493.379	HET
BC4F2	AT9064	chr5D	380562538	438793286	58.2307	HET
BC4F2	AT9064	chr7D	48934734	61233326	12.2986	HET
BC4F2	AT9064	chr7D	604016484	638207330	34.1908	HOM
BC4F2	AT9064	chr7D	607255984	637909577	30.6536	HET
BC4F2	AT9068	chr1D	24228082	418423196	394.195	HET
BC4F2	AT9068	chr1D	436871625	468921160	32.0495	HET
BC4F2	AT9068	chr2D	18596	35145160	35.1266	HET
BC4F2	AT9068	chr2D	607424408	658110955	50.6865	HET
BC4F2	AT9068	chr3D	71612	2052838	1.98123	HET
BC4F2	AT9068	chr4D	45440601	507288370	461.848	HOM
BC4F2	AT9068	chr4D	47644608	508192917	460.548	HET
BC4F2	AT9068	chr5D	560517863	576970105	16.4522	HOM
BC4F2	AT9068	chr5D	561556683	576970105	15.4134	HET
BC4F2	AT9068	chr6D	14661	488182093	488.167	HET
BC4F2	AT9068	chr6D	14661	1936645	1.92198	HOM
BC4F2	AT9068	chr6D	46133770	475945574	429.812	HOM
BC4F2	AT9068	chr7D	97957532	517559665	419.602	HET
BC4F2	AT9071	chr1D	24228082	418423196	394.195	HET
BC4F2	AT9071	chr1D	436871625	468921160	32.0495	HET
BC4F2	AT9071	chr2D	18596	485444348	485.426	HET
BC4F2	AT9071	chr2D	549427679	637426918	87.9992	HOM
BC4F2	AT9071	chr2D	550383370	644629999	94.2466	HET
BC4F2	AT9071	chr2D	643948059	658110955	14.1629	HOM
BC4F2	AT9071	chr3D	71612	1714926	1.64331	HET
BC4F2	AT9071	chr3D	71612	1927335	1.85572	HOM
BC4F2	AT9071	chr3D	401028461	446052526	45.0241	HET
BC4F2	AT9071	chr3D	607580350	621914667	14.3343	HOM
BC4F2	AT9071	chr6D	46133770	488182093	442.048	HET
BC4F2	AT9071	chr7D	97227656	458568128	361.34	HOM
BC4F2	AT9071	chr7D	104473053	452500230	348.027	HET
BC4F2	AT9090	chr2D	18596	119056533	119.038	HET
BC4F2	AT9090	chr2D	18460939	30728439	12.2675	HOM
BC4F2	AT9090	chr2D	43626480	120722074	77.0956	HOM
BC4F2	AT9090	chr2D	552066673	615889439	63.8228	HET
BC4F2	AT9090	chr7D	48843601	406871700	358.028	HOM
BC4F2	AT9090	chr7D	54201436	400962328	346.761	HET
BC4F2	AT9478	chr6D	228499	34982318	34.7538	HET
BC4F2	AT9478	chr6D	37009630	111950733	74.9411	HET
BC4F2	AT9478	chr6D	412764271	499162626	86.3984	HET
BC4F2	AT9478	chr7D	113404	4397026	4.28362	HET
BC4F4	HG20257	chr1D	2827110	10927412	8.1003	HET
BC4F4	HG20257	chr1D	7048264	63336920	56.2887	HOM
BC4F4	HG20257	chr2D	596968225	603541009	6.57278	HOM
BC4F4	HG20257	chr2D	635637924	651001438	15.3635	HOM
BC4F4	HG20257	chr5D	424672861	438349845	13.677	HET
BC4F4	HG20257	chr5D	433388981	465198786	31.8098	HOM
BC4F4	HG20257	chr7D	481838	60987891	60.5061	HOM
BC4F4	HG20259	chr1D	2827110	63336920	60.5098	HOM
BC4F4	HG20259	chr2D	596968225	607274543	10.3063	HET
BC4F4	HG20259	chr2D	635341941	651199532	15.8576	HET
BC4F4	HG20259	chr5D	423931757	465198786	41.267	HOM
BC4F4	HG20259	chr7D	5596986	16250525	10.6535	HET
BC4F4	HG20259	chr7D	9350276	60987891	51.6376	HOM
BC4F4	HG20260	chr1D	2827110	63336920	60.5098	HOM
BC4F4	HG20260	chr2D	597084494	607274543	10.19	HET
BC4F4	HG20260	chr2D	635801012	651119568	15.3186	HET
BC4F4	HG20260	chr5D	424672861	438349845	13.677	HET
BC4F4	HG20260	chr5D	433950664	464787385	30.8367	HOM
BC4F4	HG20260	chr7D	2511716	60954481	58.4428	HOM
BC4F4	HG20261	chr1D	2827110	11020247	8.19314	HET
BC4F4	HG20261	chr1D	7048264	63072109	56.0238	HOM
BC4F4	HG20261	chr2D	596968225	603541009	6.57278	HOM
BC4F4	HG20261	chr2D	635801012	651119568	15.3186	HET
BC4F4	HG20261	chr5D	424672861	438349845	13.677	HET
BC4F4	HG20261	chr5D	433950664	464787385	30.8367	HOM
BC4F4	HG20261	chr7D	481838	16250525	15.7687	HET
BC4F4	HG20261	chr7D	9350276	60954481	51.6042	HOM
BC4F4	HG20262	chr1D	2827110	11020247	8.19314	HET
BC4F4	HG20262	chr1D	7048264	63072109	56.0238	HOM
BC4F4	HG20262	chr2D	597084494	606557240	9.47275	HET
BC4F4	HG20262	chr2D	635637924	651001438	15.3635	HOM
BC4F4	HG20262	chr5D	424672861	438349845	13.677	HET
BC4F4	HG20262	chr5D	433950664	464787385	30.8367	HOM
BC4F4	HG20262	chr7D	835809	60954481	60.1187	HOM
BC4F4	HG20263	chr1D	2827110	10927412	8.1003	HET
BC4F4	HG20263	chr1D	7048264	63072109	56.0238	HOM
BC4F4	HG20263	chr5D	424672861	438349845	13.677	HET
BC4F4	HG20263	chr5D	433950664	464787385	30.8367	HOM
BC4F4	HG20263	chr7D	481838	16250525	15.7687	HET
BC4F4	HG20263	chr7D	9350276	60851900	51.5016	HOM
BC4F4	HG20270	chr1D	2827110	28358048	25.5309	HOM
BC4F4	HG20270	chr1D	19698226	63072109	43.3739	HET
BC4F4	HG20270	chr2D	597084494	603541009	6.45651	HOM
BC4F4	HG20270	chr2D	635801012	651119568	15.3186	HET
BC4F4	HG20270	chr5D	424561695	464787385	40.2257	HOM
BC4F4	HG20270	chr7D	25719821	48546893	22.8271	HET
BC4F4	HG20279	chr5D	460297261	467227683	6.93042	HET
BC4F4	HG20279	chr7D	481838	20581200	20.0994	HOM
BC4F4	HG20279	chr7D	19409304	62740561	43.3313	HET
BC4F4	HG20296	chr2D	76482113	145247887	68.7658	HOM
BC4F4	HG20296	chr2D	452234732	579749543	127.515	HET
BC4F4	HG20296	chr2D	576807770	589741735	12.934	HOM
BC4F4	HG20296	chr2D	584926203	591703569	6.77737	HET
BC4F4	HG20296	chr2D	596066419	615618323	19.5519	HET
BC4F4	HG20296	chr2D	635801012	649010489	13.2095	HOM
BC4F4	HG20296	chr2D	646642081	654274381	7.6323	HET
BC4F4	HG20296	chr2D	652401777	658110955	5.70918	HOM
BC4F4	HG20296	chr5D	420524499	460829204	40.3047	HOM
BC4F4	HG20296	chr5D	458136743	479241398	21.1047	HET
BC4F4	HG20296	chr7D	602499762	621439683	18.9399	HET
BC4F4	HG20296	chr7D	615676520	645031549	29.355	HOM
